# Supplementary material for: A rationale for the rapid extraction of ultra-low-level uranyl ions in simulated bioassays regulated by Mn-dopants over magnetic nanoparticles
Source: Royal Society of Chemistry journal article supplement (doi:10.1039/d3ra01957h), 2023-01-01
Supplement: d3ra01957h1.pdf [file d3ra01957h1.pdf]

### Supplementary Information

#### A Rationale for Rapid Extraction of Ultra-low level Uranyl ion in Simulated Bioassays regulated by Mn-dopants over Magnetic Nano Particles

P. Mandal, P.D. Sawant, K. Bhattacharyya\*

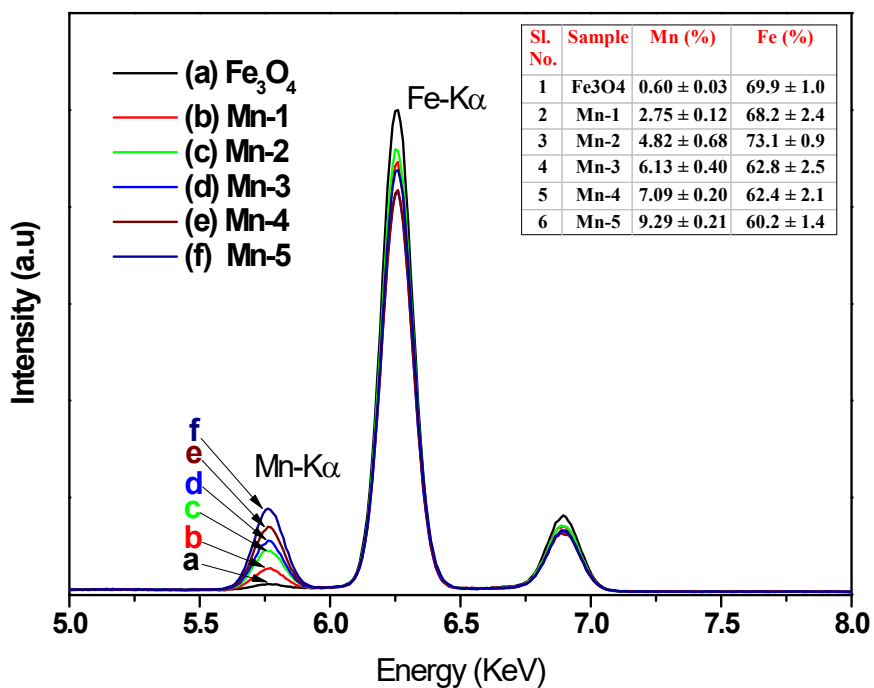

**Fig.S-1:** ED-XRF data for the different Mn-doped Fe<sub>3</sub>O<sub>4</sub> system; a) undoped Fe<sub>3</sub>O<sub>4</sub>; b) Mn-1 c) Mn-2 d) Mn-3 e) Mn-4 f) Mn-5

**Table S-1:** Atomic Weight Percentage of Elements as calculated from EDS data

| Sample                         | Fe   | O    | Mn  |
|--------------------------------|------|------|-----|
| Fe <sub>3</sub> O <sub>4</sub> | 32.7 | 67.3 | 0   |
| Mn-1                           | 30.6 | 68.1 | 1.3 |
| Mn-2                           | 29.7 | 67.8 | 2.5 |
| Mn                             | 27.6 | 67.7 | 4.7 |

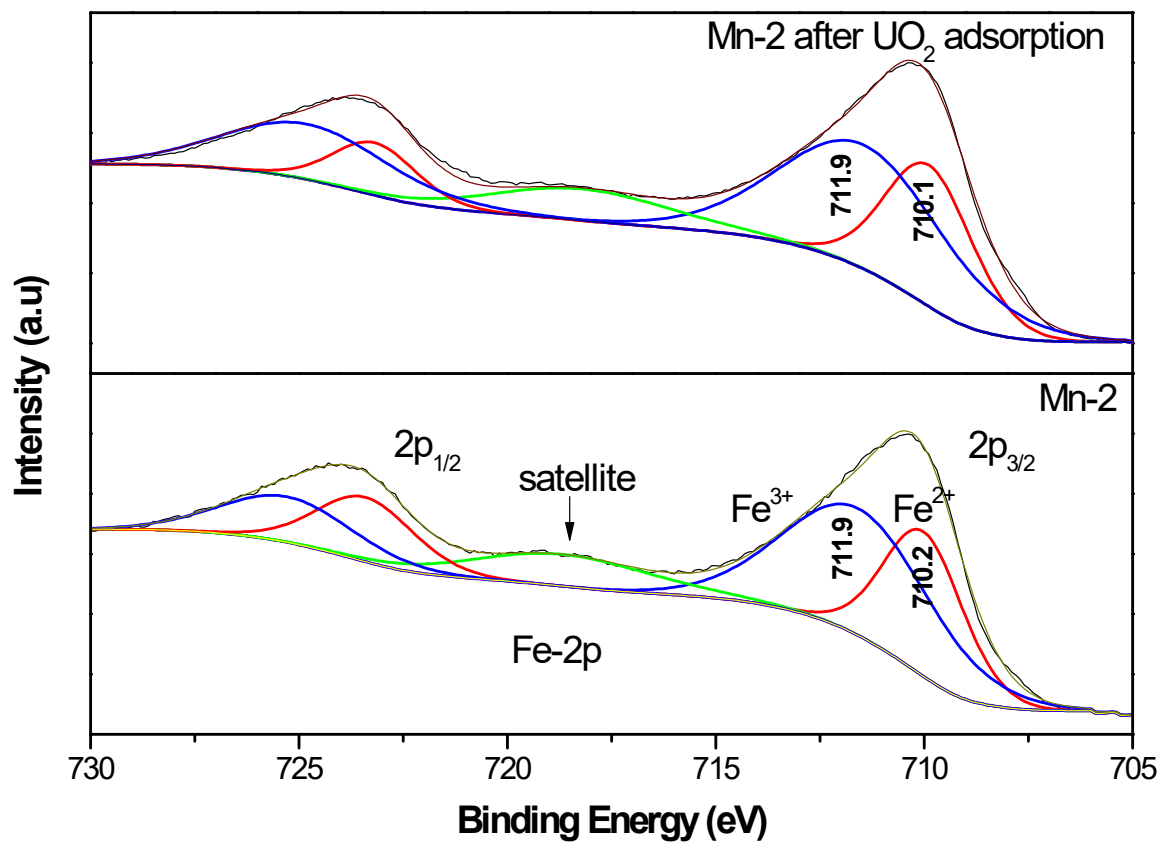

Fig. S-2: XPS Spectra for Fe-2p for comparison of the process of sorption interaction; a) Mn-2 before uranyl sorption and b) Mn-2 after uranyl sorption post drying.

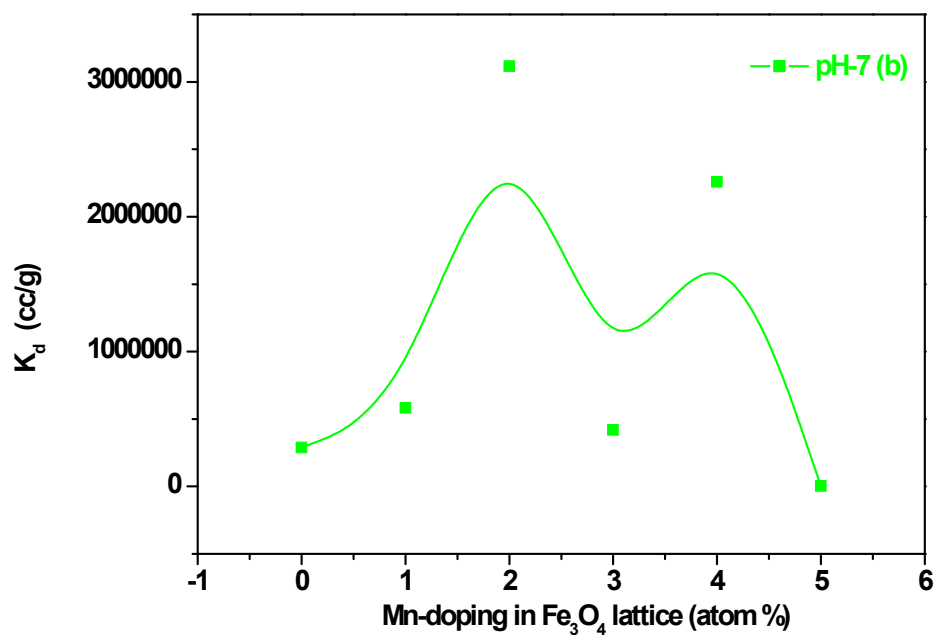

Fig S-3: Plot for  $K_d$  versus the Mn-doping (atom %) in the Fe<sub>3</sub>O<sub>4</sub> lattice at neutral medium (pH-7).

**Table S-2:** SAED calculation for Fe<sub>3</sub>O<sub>4</sub> system.

| <b>1/D<br/>(nm<sup>-1</sup>)</b> | <b>1/r<br/>(nm<sup>-1</sup>)</b> | <b>r<br/>(nm)</b> | <b>d-spacing (Å)</b> | <b>d-spacing (Å)<br/>(JCPDS-75-449)</b> | <b>h k l<br/>(JCPDS-75-449)</b> |
|----------------------------------|----------------------------------|-------------------|----------------------|-----------------------------------------|---------------------------------|
| 6.893                            | 3.4465                           | 0.2901            | 2.9015               | 2.9380                                  | 2 2 0                           |
| 8.08                             | 4.04                             | 0.2475            | 2.4752               | 2.5055                                  | 3 1 1                           |
| 9.655                            | 4.8275                           | 0.2071            | 2.0715               | 2.0775                                  | 4 0 0                           |
| 12.66                            | 6.33                             | 0.1580            | 1.5798               | 1.5992                                  | 5 1 1                           |
| 13.645                           | 6.8225                           | 0.1466            | 1.4657               | 1.4690                                  | 4 4 0                           |
| 18.671                           | 9.3355                           | 0.1071            | 1.0712               | 1.1104                                  | 6 4 2                           |

**Table S-3:** SAED calculation for Mn doped Fe<sub>3</sub>O<sub>4</sub> system (Mn-3).

| <b>1/D<br/>(nm<sup>-1</sup>)</b> | <b>1/r<br/>(nm<sup>-1</sup>)</b> | <b>r<br/>(nm)</b> | <b>d-spacing (Å)</b> | <b>d-spacing (Å)<br/>(JCPDS-75-449)</b> | <b>h k l<br/>(JCPDS-75-449)</b> |
|----------------------------------|----------------------------------|-------------------|----------------------|-----------------------------------------|---------------------------------|
| 6.913                            | 3.4565                           | 0.2893            | 2.8931               | 2.9380                                  | 220                             |
| 7.992                            | 3.996                            | 0.2502            | 2.5025               | 2.5055                                  | 311                             |
| 9.664                            | 4.832                            | 0.2070            | 2.0695               | 2.0775                                  | 400                             |
| 12.843                           | 6.4215                           | 0.1557            | 1.5573               | 1.5992                                  | 511                             |
| 13.627                           | 6.8135                           | 0.1468            | 1.4677               | 1.4690                                  | 440                             |

**Table- S-4:** Optimisation of the K-points for the bulk calculation of Fe<sub>3</sub>O<sub>4</sub>

| <b>Sl. No.</b> | <b>K -Points</b> | <b>ΔE (eV)/atom</b> | <b>Magnetic Moment</b> |
|----------------|------------------|---------------------|------------------------|
| 1              | 1 1 1            | -2.487617           | 59                     |
| 2              | 3 3 3            | -2.577881           | 48                     |
| 3              | 5 5 5            | -2.577813           | 48                     |

**Table -S-5:** Comparison of Cell parameters for Fe<sub>3</sub>O<sub>4</sub> and Mn-doped Fe<sub>3</sub>O<sub>4</sub> system.

| Sl. No. | Mn-doping                           | Cell Parameter (a=b=c) (Å) Experimental | Cell Volume (Å) <sup>3</sup> Experimental | Cell Parameter (a=b=c) (Å) Computational | Cell Parameter (a=b=c) (Å) <sup>3</sup> Computational |
|---------|-------------------------------------|-----------------------------------------|-------------------------------------------|------------------------------------------|-------------------------------------------------------|
| 1       | 0 (Fe <sub>3</sub> O <sub>4</sub> ) | 8.346(2)                                | 581.54(0.28)                              | 8.43036                                  | 599.15173                                             |
| 2       | Mn-1(Oct)                           | 8.369(4)                                | 586.24(0.51)                              | 8.43877                                  | 600.94877                                             |
| 3       | Mn-1(tet)                           | 8.369(4)                                | 586.24(0.51)                              | 8.34808                                  | 581.78137                                             |

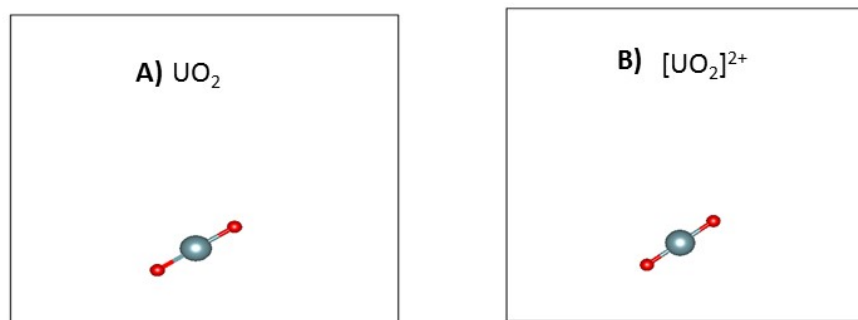

**Fig. S-4:** Optimised structures for A) UO<sub>2</sub> and B) UO<sub>2</sub>-ion.

**Table -S-6:** Energy and bond Length for calculated UO<sub>2</sub> and [UO<sub>2</sub>]<sup>2+</sup>- ion system.

| Sample                           | Energy (eV) | U-O (length) (Å) |
|----------------------------------|-------------|------------------|
| UO <sub>2</sub>                  | -28.745974  | 1.8201           |
| [UO <sub>2</sub> ] <sup>2+</sup> | -12.759074  | 1.7284           |

### B. Calculation of Interaction Energy of [UO<sub>2</sub>]<sup>2+</sup> ion with the Mn-doped Fe<sub>3</sub>O<sub>4</sub> (3 1 1) Surface

$$\begin{aligned} \text{Interaction Energy} = & \text{Energy of [UO}_2\text{]}^{2+} \text{ adsorbed at particular site in Mn- doped Fe}_3\text{O}_4 \\ & (3\ 1\ 1) \text{ surface} - \text{Slab energy Mn- doped Fe}_3\text{O}_4 (3\ 1\ 1) \text{ surface} \\ & - \text{Energy of [UO}_2\text{]}^{2+} \text{ ion} \dots\dots\dots(4) \end{aligned}$$

Slab energy Mn-doped Fe<sub>3</sub>O<sub>4</sub> = -824.80301 eV

Energy of [UO<sub>2</sub>]<sup>2+</sup> ion = -12.759074 eV

Interaction energy with Mn<sup>2+</sup> site = -854.61019 + [824.80301 + 12.759074] eV  
= -17.048144 eV

Interaction Energy with Fe-Tetrahedral (Fe<sup>3+</sup>) site = -853.83122 +  
[824.80301 + 12.759074] eV  
= -16.269136 eV

Interaction energy with Fe-Octahedral (Fe<sup>2+</sup>) site = -853.85384 +  
[824.80301 + 12.759074] eV  
= -16.29179 eV

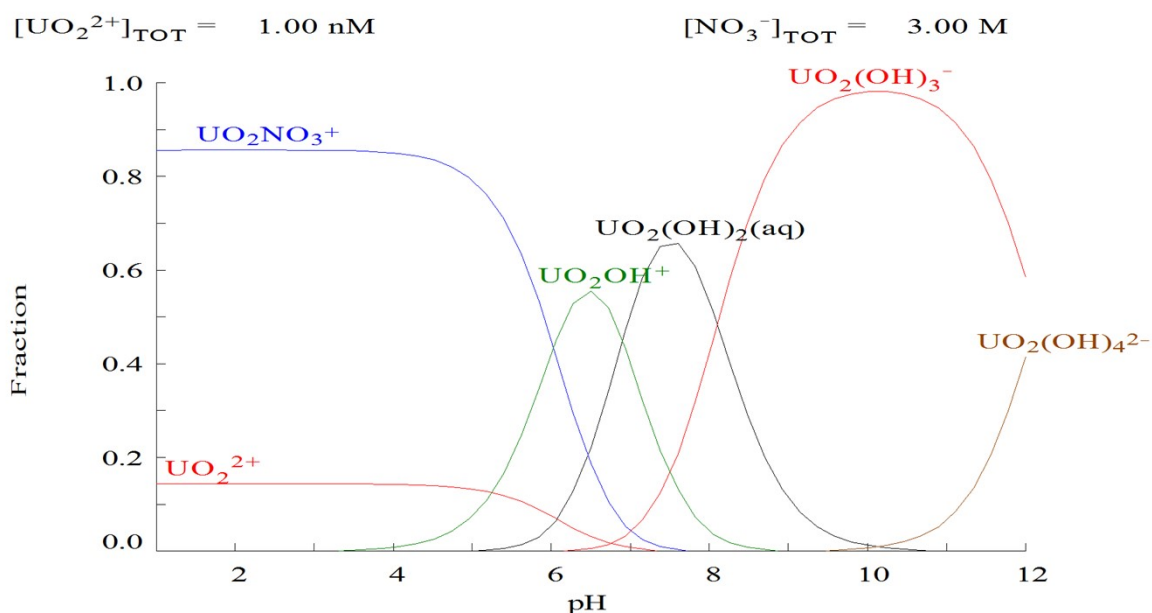

**Fig.S-5:** Speciation of Uranyl ion at different pH (Concentration of UO<sub>2</sub><sup>2+</sup> = 1nM and NO<sub>3</sub><sup>-</sup> = 3M) as suggested in the experimental section. The Figure is made by the MEDUSSA HYDRA- Software plot.
